# Supplementary material for: Food preference acquired by social transmission is altered by the absence of the olfactory marker protein in mice
Source: Front Nutr. 2022 Nov 9;9:1026373. doi: 10.3389/fnut.2022.1026373 (PMC9682023; doi:10.3389/fnut.2022.1026373)
Supplement: Supplementary file 2 [file Table_1.XLSX]

## Sheet: Figure 1
Figure 1C
						Statistical tests
cookie test
	OMP++	OMP--				OMP++ vs OMP-- (genotype comparaison)
	7	3				F value non significant
	4	12				t test unpaired , parametric, two-tailed, p=0.8673, ns
	11	13
	3	23
	71	28
	16	14
	21	6
		15
		43
Figure 1D
odorant avoidance ratio
	OMP++	OMP--				OMP++ vs OMP-- (genotype comparaison)
	-0.316901	-0.370588				z score (PRaverage/SEM) OMP++:significant, OMP--: significant
	-0.0633803	-0.330769				F value non significant
	-0.145833	-0.240385				t test unpaired, parametric, two-tailed, p=0.7098, ns
	-0.114035	-0.217391
	0.184932	-0.37218
	-0.154545	-0.0964912
	-0.303571	-0.242857
	-0.0263158	-0.0434783
	-0.294118	0.15625
	0.155172	-0.271429
	-0.112903	-0.0416667
	-0.25	0.282609
PR average	-0.120125	-0.149031
SEM	0.0478569	0.0599023
z score	-2.51009	-2.48791
odorant attraction ratio
	OMP++	OMP--				OMP++ vs OMP-- (genotype comparaison)
	0.166667	0.111111				z score (Praverage/SEM) OMP++:significant, OMP--: significant
	0.136364	-0.166667				F value non significant
	0	0.369565				t test unpaired, parametric, two-tailed ,p=0.6469, ns
	0.5	0.205882
	0.357143	0.181818
	0.166667	0.323529
PR average	0.22114	0.170873
SEM	0.0726371	0.0778101
z score	3.04445	2.19603
Figure 1E
sniffing number	OMP++	OMP--				OMP++ vs OMP-- (genotype comparaison)
	10	11				F value non significant
	7	6				t test unpaired, parametric, two-tailed, p=0.0166,*
	5	20
	5	12
	12	15
	2	14
	5	7
	4	12
	5	3
	0	5
	2	7
	1	3

## Sheet: Figure 2
Figure 2C
						Statistical tests
western blot
	non-stimulated		stimulated			non-stimulated OMP++ vs stimulated OMP++ (group comparaison)
	OMP++	OMP--	OMP++	OMP--		F value significant p=0,0423*,
	0.583929	0.860578	4.42943	1.03878		Mann whitney (Wilcoxon), unpaired, non parametric, one-tailed, p <0,0001,***
	0.487336	0.909136	3.09833	0.932895
	1.22659	1.29116	3.04909	0.931612
	1.51351	1.18231	3.6582	0.958834		non-stimulated OMP-- vs stimulated OMP-- (group comparaison)
	1.62913	1.02141	3.22648	1.24356		F value non significant
	0.423484	0.735399	3.32921	0.683829		t test unpaired, parametric, one-tailed, p=0,1870, ns
	1.12871		3.71473	0.780735
	0.816686		2.64584	0.723982
	1.19063		1.84635	0.698137
			1.48774	0.970463
			1.49262	1.07862
			4.50025
			3.78911
			3.11242
			2.87981
Figure 2F
PS6 nb de cell
	non-stimulated		stimulated
	OMP++	OMP--	OMP++	OMP--		non-stimulated OMP++ vs stimulated OMP++ (group comparaison)
	0.972477	0.9375	2	1.0747		F value non significant
	0.752294	0.846037	1.87156	0.716463		t test unpaired, parametric, one-tailed, p=<0,0001, ***
	0.862385	0.990854	1.94495	0.876524
	1.52294	1.09756	1.68807	1.0061
	1.59633	1.30335	1.9633	1.12043		non-stimulated OMP-- vs stimulated OMP-- (group comparaison)
	0.715596	1.1128	2.55046	1.14329		F value non significant
	0.807339	1.20427	2.44037	1.22713		t test unpaired, parametric, one-tailed,p=0.201, ns
	1.00917	0.777439	2.33028	1.12805
	0.917431	0.876524	2.14679	1.15854
	0.844037	0.853659	2.29358	1.09756
			2.36697	0.952744
			2.11009	1.04421
			2.05505	1.04421
			1.94495	1.06707
			2.23853	1.10518
			2.78899	1.3872
			1.65138	1.10518
			2.12844	1.18902
			2.42202	0.9375
			2.16514	0.823171
			2.0367	0.792683
				1.14329
Figure 2G
pS6 intensity
	non-stimulated		stimulated
	OMP++	OMP--	OMP++	OMP--		non-stimulated OMP++ vs stimulated OMP++ (group comparaison)
	1.15263	0.747423	0.766924	1.14575		F value non significant
	0.870871	1.47519	0.849777	1.40162		t test unpaired, parametric, one-tailed, p=0.0496, *
	0.764874	1.64105	0.77706	1.48228
	0.611906	1.75224	1.05225	2.08508
	0.433805	1.24308	0.965125	1.54424		non-stimulated OMP-- vs stimulated OMP-- (group comparaison)
	1.0919	0.610154	1.52547	1.30523		F value non significant
	1.54207	0.489823	2.30168	1.39556		t test unpaired, parametric, one-tailed,p=0.0197,*
	1.71006	0.724156	2.718	1.19206
	0.821887	0.611404	1.67414	1.75974
	0.335623	0.705489		0.825461
Figure 2H
PS6 nb de cell
	non-stimulated
	OMP++	OMP--				OMP++ vs OMP-- (genotype comparaison)
	53	123				F value non significant
	41	111				t test, unpaired, parametric, two-tailed, p<0,0001,***
	47	130
	83	144
	87	171
	39	146
	44	158
	55	102
	50	115
	46	112

## Sheet: Figure 3
Figure 3C
						Statistical tests
c Fos intensity glomerule
	non-stimulated		stimulated
	OMP++	OMP--	OMP++	OMP--		non-stimulated OMP++ vs stimulated OMP++ (group comparaison)
	1.15913	0.902959	2.44315	0.921422		F value significant p=0,0228*
	1.22203	0.990003	4.7781	1.84518		Mann Whitney (Wilcoxon), unpaired, non parametric, one-tailed, p=0,0040, **
	0.690168	1.0751	3.1912	0.49312
	1.07631	1.29213	3.64254	0.731897		non-stimulated OMP-- vs stimulated OMP-- (group comparaison)
	0.852359	0.73981	3.84156	0.76195		F value non significant
						t test, unpaired, parametric, one-tailed, p=0,4247, ns
Figure 3D
c Fos intensity granular zone
	non-stimulated		stimulated
	OMP++	OMP--	OMP++	OMP--		non-stimulated OMP++ vs stimulated OMP++ (group comparaison)
	0.470205	1.01228	2.59893	1.35338		F value significant p=0,0128*
	1.3885	0.617775	1.86538	2.16587		Mann Whitney (Wilcoxon), unpaired, non parametric, one-tailed, p=0,0043, **
	1.13889	1.36758	5.44413	2.15845
	1.46066	1.1989	2.45748	1.91232
	0.728352	0.805344	2.15301	2.6077		non-stimulated OMP-- vs stimulated OMP-- (group comparaison)
	0.813392	0.998124	1.3764	1.4849		F value non significant
						t test, unpaired, parametric, one-tailed, p=0,0008, ***
Figure 3E
c Fos intensity glomerule
	non-stimulated
	OMP++	OMP--				OMP++ vs OMP-- (genotype comparaison)
	5067	20882				F value significant p=0,0095 **
	5342	22895				Mann Whitney (Wilcoxon), unpaired, non parametric, two-tailed, p=0,0079, **
	3017	24863
	4705	29882
	3726	17109
c Fos intensity granular zone
	non-stimulated
	OMP++	OMP--				OMP++ vs OMP-- (genotype comparaison)
	6060	47206				F value non significant
	17895	28809				t test, unpaired, parametric, two-tailed, p=0,0001, ***
	14678	63775
	18825	55909
	9387	37556
	10483	46546

## Sheet: Figure 4
Figure 4B
										Statistical tests
oronasal investigation number
	OMP++	OMP--								OMP++ vs OMP-- (genotype comparaison)
	3.66667	15.5								F value significant p=0,0251*
	4	21								Mann Whitney (Wilcoxon), unpaired, non parametric, two-tailed, p=0,0022, **
	7.5	6
	3	16
	9	13
	7.5	17
	3	15
	6	5
	5	8.66667
		8.33333
		13
		16
		5
		8.66667
		7.33333
Figure 4C
oronasal investigation time
	OMP++	OMP--								OMP++ vs OMP-- (genotype comparaison)
	23	66								F value significant p=<0,0001***
	24	119								Mann Whitney (Wilcoxon), unpaired, non parametric, two-tailed, p=<0,0001, ***
	22	54
	44	156
	27	78
	24	93
	23	157
	21	32
	21	78
		65
		68
		95
		42
		91
		80
Figure 4D
PR without stfp	OMP++	odor 1 (gramme)	odor 2 (gramme)			OMP--	odor 1 (gramme)	odor 2 (gramme)
	Cinnamon-cocoa					Cinnamon-cocoa				OMP++ vs OMP-- cinnamon-cocoa (genotype comparaison)
	0.369565	0.6	0.09			-0.3125	0.26	0.06		z score (Praverage/SEM), OMP++: ns, OMP--: ns
	-0.185714	0.22	0.48			0.06	0.14	0.11		F value non significant
	0.419355	0.57	0.05			0.264706	0.08	0.26		t test unpaired, parametric, two-tailed, p=0,9972, ns
	0.00793651	0.31	0.32			-0.195652	0.14	0.32
	-0.0185185	0.28	0.26			-0.0142857	0.18	0.17
	0.306452	0.5	0.12			0.138889	0.13	0.23
	0.363636	0.38	0.06			0.35	0.17	0.03
	-0.0762712	0.34	0.25			-0.0909091	0.09	0.13
	-0.0849057	0.31	0.22			-0.0384615	0.21	0.18
	-0.490476	0.01	1.04			0.00847458	0.29	0.3
	-0.480583	0.02	1.01			0.133803	0.45	0.26
	-0.0217391	0.12	0.11			-0.0443038	0.36	0.43
	-0.214286	0.04	0.1			-0.221311	0.44	0.17
	0.147059	0.11	0.06			0.276119	0.15	0.52
						-0.1	0.32	0.48
						0.487342	0.01	0.78
						-0.256098	0.1	0.31
						-0.3	0.09	0.36
						-0.0833333	0.05	0.07
PR average	0.00296501				PR average	0.00328835
SEM	0.0786536				SEM	0.0491059
z score	0.0376971				z score	0.0669644
	Anice-oregano
	0.0507246	0.38	0.31
	0.0211268	0.37	0.34			Anice-oregano
	0.284314	0.11	0.4			0.1	0.18	0.27
	0.117021	0.29	0.18			-0.141975	0.29	0.52		OMP++ vs OMP-- anice-oregano (genotype comparaison)
	0.3	0.06	0.24			-0.103774	0.32	0.21		z score (Praverage/SEM), OMP++: ns, OMP--: ns
	-0.458333	0.23	0.01			-0.138889	0.13	0.23		F value non significant
	-0.284091	0.19	0.69			-0.403846	0.05	0.47		t test unpaired, parametric, two-tailed, p=0,3276, ns
	-0.0833333	0.3	0.42			0.207692	0.19	0.46
	0.433333	0.04	0.56			0.0384615	0.24	0.28
						0.0846154	0.38	0.27
						-0.264706	0.26	0.08
						-0.180851	0.15	0.32
						-0.030303	0.35	0.31
						-0.0384615	0.24	0.28
						0.06	0.22	0.28
						0.0806452	0.36	0.26
						0.00769231	0.33	0.32
PR average	0.0423069				PR average	-0.0482466
SEM	0.0955204				SEM	0.0411446
z score	0.44291				z score	-1.17261
	Thyme-basil
	0.032468	0.41	0.36
	-0.391304	0.82	0.1
	-0.119048	0.32	0.52			Thyme-basil
	-0.088235	0.35	0.5			-0.0405405	0.4	0.34
	0.185714	0.22	0.48			0.06	0.42	0.33		OMP++ vs OMP-- thyme-basil (genotype comparaison)
	0.236842	0.1	0.28			0.205128	0.23	0.55		z score (Praverage/SEM), OMP++: ns, OMP--: ns
	0.018519	0.26	0.28			-0.115385	0.2	0.32		F value non significant
	-0.166667	0.16	0.32			0.331325	0.69	0.14		t test unpaired, parametric, two-tailed, p=0,8629, ns
	0.12069	0.22	0.36			-0.173469	0.33	0.16
	0.234177	0.58	0.21			-0.0357143	0.26	0.3
						-0.0614035	0.32	0.25
						-0.238095	0.11	0.31
						0.0438596	0.26	0.31
						-0.0957447	0.19	0.28
						0.15	0.14	0.26
						0.0625	0.21	0.27
						-0.0116279	0.21	0.22
						-0.06	0.22	0.28
PR average	0.0063156				PR average	0.00138887
SEM	0.0635821				SEM	0.0380126
z score	0.0993298				z score	0.036537
	Merge					Merge
	0.369565	0.6	0.09			-0.3125	0.26	0.06
	-0.185714	0.22	0.48			0.06	0.14	0.11
	0.419355	0.57	0.05			0.264706	0.08	0.26
	0.00793651	0.31	0.32			-0.195652	0.14	0.32
	-0.0185185	0.28	0.26			-0.0142857	0.18	0.17
	0.306452	0.5	0.12			0.138889	0.13	0.23		OMP++ vs OMP-- Merge (genotype comparaison)
	0.363636	0.38	0.06			0.35	0.17	0.03		z score (Praverage/SEM), OMP++: ns, OMP--: ns
	-0.0762712	0.34	0.25			-0.0909091	0.09	0.13		F value significant p=0,0269 *
	-0.0849057	0.31	0.22			-0.0384615	0.21	0.18		Mann Whitney (Wilcoxon),unpaired, non parametric, two-tailed,p=0,4305, ns
	-0.490476	0.01	1.04			0.00847458	0.29	0.3
	-0.480583	0.02	1.01			0.133803	0.45	0.26
	-0.0217391	0.12	0.11			-0.0443038	0.36	0.43
	-0.214286	0.04	0.1			-0.221311	0.44	0.17
	0.147059	0.11	0.06			0.276119	0.15	0.52
	0.0507246	0.38	0.31			-0.1	0.32	0.48
	0.0211268	0.37	0.34			0.487342	0.01	0.78
	0.284314	0.11	0.4			-0.256098	0.1	0.31
	0.117021	0.29	0.18			-0.3	0.09	0.36
	0.3	0.06	0.24			-0.0833333	0.05	0.07
	-0.458333	0.23	0.01			0.1	0.18	0.27
	-0.284091	0.19	0.69			-0.141975	0.29	0.52
	-0.0833333	0.3	0.42			-0.103774	0.32	0.21
	0.433333	0.04	0.56			-0.138889	0.13	0.23
	0.032468	0.41	0.36			-0.403846	0.05	0.47
	-0.391304	0.82	0.1			0.207692	0.19	0.46
	-0.119048	0.32	0.52			0.0384615	0.24	0.28
	-0.088235	0.35	0.5			0.0846154	0.38	0.27
	0.185714	0.22	0.48			-0.264706	0.26	0.08
	0.236842	0.1	0.28			-0.180851	0.15	0.32
	0.018519	0.26	0.28			-0.030303	0.35	0.31
	-0.166667	0.16	0.32			-0.0384615	0.24	0.28
	0.12069	0.22	0.36			0.06	0.22	0.28
	0.234177	0.58	0.21			0.0806452	0.36	0.26
						0.00769231	0.33	0.32
						-0.0405405	0.4	0.34
						0.06	0.42	0.33
						0.205128	0.23	0.55
						-0.115385	0.2	0.32
						0.331325	0.69	0.14
						-0.173469	0.33	0.16
						-0.0357143	0.26	0.3
						-0.0614035	0.32	0.25
						-0.238095	0.11	0.31
						0.0438596	0.26	0.31
						-0.0957447	0.19	0.28
						0.15	0.14	0.26
PR average	0.0147099					0.0625	0.21	0.27
SEM	0.0451868					-0.0116279	0.21	0.22
z score	0.325536					-0.06	0.22	0.28
					PR average	-0.0130691
					SEM	0.0260988
					z score	-0.500756
Figure 4E
PR stfp
	OMP++	odor 1 (gramme)	odor 2 (gramme)			OMP--	odor 1 (gramme)	odor 2 (gramme)
	Cinnamon-cocoa (PR)					Cinnamon-cocoa
	0.34375	0.54	0.1			-0.176471	0.22	0.46
	0.193548	0.43	0.19			-0.085366	0.17	0.24
	0.414286	0.32	0.03			0.343137	0.43	0.08
	0.257576	0.25	0.08			-0.257143	0.17	0.53		OMP++ vs OMP-- cinnamon-cocoa (genotype comparaison)
	0.461538	0.75	0.03			0.075	0.23	0.17		z score (Praverage/SEM) OMP++: significant, OMP--: significant
	0.463415	0.79	0.03			0.182927	0.28	0.13		F value significant p=0,0308,*
	0.209677	0.66	0.27			0.388889	0.32	0.04		Mann Whitney (Wilcoxon),unpaired, non parametric, two-tailed, p=0,0425, *
	0.263158	0.58	0.18			0.1625	0.53	0.27
	0.188312	0.53	0.24			0.42	0.23	0.02
	0.292683	0.63	0.17			0.131579	0.24	0.14
	0.349315	0.62	0.11			0.142857	0.27	0.15
	0.108696	0.42	0.27			-0.0625	0.14	0.18
	0.111765	0.52	0.33			0.181818	0.15	0.07
	0.166667	0.52	0.26			0.392857	0.5	0.06
						0.285714	0.33	0.09
						-0.201987	0.45	1.06
PR average	0.27317				PR average	0.120238
SEM	0.0318919				SEM	0.0553609
z score	8.5655				z score	2.1719
	Anice-oregano (PR)
	0.0735294	0.39	0.29
	0.238095	0.62	0.22			Anice-oregano
	0.0217391	0.12	0.11			0.378788	0.58	0.08
	0.214286	0.2	0.08			0.414894	0.43	0.04		OMP++ vs OMP-- anice-oregano (genotype comparaison)
	-0.136364	0.12	0.21			0.0263158	0.3	0.27		z score (Praverage/SEM) OMP++:significant, OMP--: significant
	0.203704	0.19	0.08			-0.195652	0.07	0.16		F value non significant
	0.390625	0.57	0.07			-0.158537	0.14	0.27		t test unpaired, parametric, two-tailed, p=0,0335, *
	0.457746	0.68	0.03			0.0277778	0.19	0.17
	0.482456	0.56	0.01			0.105263	0.23	0.15
	0.47561	0.8	0.02			0.336364	0.46	0.09
	0.295455	0.7	0.18			0.145833	0.31	0.17
	0.416667	0.88	0.08			0.119048	0.26	0.16
						0.0192308	0.27	0.25
						0.0517241	0.16	0.13
						0.0925926	0.16	0.11
						-0.159091	0.15	0.29
						0.348485	0.28	0.05
						-0.057377	0.27	0.34
PR average	0.261129				PR average	0.0934787
SEM	0.0572283				SEM	0.048391
z score	4.56294				z score	1.93174
	Thyme-basil (PR)
	0.225	0.58	0.22
	0.135417	0.61	0.35
	0.136364	0.49	0.28
	0.190476	0.58	0.26
	0.178571	0.57	0.27
	0.170103	0.65	0.32			Thyme-basil
	0.291209	0.72	0.19			0.137931	0.37	0.21		OMP++ vs OMP-- thyme-basil (genotype comparaison)
	0.102941	0.41	0.27			0.0901639	0.36	0.25		z score (Praverage/SEM) OMP++:significant, OMP--: non significant
	0.103175	0.38	0.25			0.245098	0.38	0.13		F value significant p=0,0003 ***
	0.145161	0.2	0.11			0.205882	0.24	0.1		Mann Whitney (Wilcoxon),unpaired, parametric, two-tailed, p=0,0865, ns
	0.109756	0.25	0.16			0.0227273	0.23	0.21
	0.198413	0.44	0.19			0.219298	0.41	0.16
	0.201493	0.47	0.2			0.416667	0.33	0.03
	0.277778	0.49	0.14			-0.269231	0.24	0.8
						0.136364	0.35	0.2
						-0.0686275	0.22	0.29
						0.155172	0.38	0.2
						-0.192308	0.2	0.45
						-0.107143	0.22	0.34
						0.175	0.27	0.13
						0.0172414	0.15	0.14
						-0.0901639	0.25	0.39
PR average	0.176133				PR average	0.0683795
SEM	0.0160072				SEM	0.0449261
z score	11.0033				z score	1.52205
	Merge (PR)
	0.34375	0.54	0.1
	0.193548	0.43	0.19
	0.414286	0.32	0.03
	0.257576	0.25	0.08
	0.461538	0.75	0.03
	0.463415	0.79	0.03
	0.209677	0.66	0.27
	0.263158	0.58	0.18			Merge
	0.188312	0.53	0.24			-0.176471	0.22	0.46
	0.292683	0.63	0.17			-0.085366	0.17	0.24		OMP++ vs OMP-- Merge (genotype comparaison)
	0.349315	0.62	0.11			0.343137	0.43	0.08		z score (Praverage/SEM) OMP++: significant, OMP--: significant
	0.108696	0.42	0.27			-0.257143	0.17	0.53		F value significant p=0,0261 *
	0.111765	0.52	0.33			0.075	0.23	0.17		Mann Whitney (Wilcoxon), unpaired, parametric, two-tailed, p=0,0003, ***
	0.166667	0.52	0.26			0.182927	0.28	0.13
	0.0735294	0.39	0.29			0.388889	0.32	0.04
	0.238095	0.62	0.22			0.1625	0.53	0.27
	0.0217391	0.12	0.11			0.42	0.23	0.02
	0.214286	0.2	0.08			0.131579	0.24	0.14
	-0.136364	0.12	0.21			0.142857	0.27	0.15
	0.203704	0.19	0.08			-0.0625	0.14	0.18
	0.390625	0.57	0.07			0.181818	0.15	0.07
	0.457746	0.68	0.03			0.392857	0.5	0.06
	0.482456	0.56	0.01			0.285714	0.33	0.09
	0.47561	0.8	0.02			-0.201987	0.45	1.06
	0.295455	0.7	0.18			0.378788	0.58	0.08
	0.416667	0.88	0.08			0.414894	0.43	0.04
	0.225	0.58	0.22			0.0263158	0.3	0.27
	0.135417	0.61	0.35			-0.195652	0.07	0.16
	0.136364	0.49	0.28			-0.158537	0.14	0.27
	0.190476	0.58	0.26			0.0277778	0.19	0.17
	0.178571	0.57	0.27			0.105263	0.23	0.15
	0.170103	0.65	0.32			0.336364	0.46	0.09
	0.291209	0.72	0.19			0.145833	0.31	0.17
	0.102941	0.41	0.27			0.119048	0.26	0.16
	0.103175	0.38	0.25			0.0192308	0.27	0.25
	0.145161	0.2	0.11			0.0517241	0.16	0.13
	0.109756	0.25	0.16			0.0925926	0.16	0.11
	0.198413	0.44	0.19			-0.159091	0.15	0.29
	0.201493	0.47	0.2			0.348485	0.28	0.05
	0.277778	0.49	0.14			-0.057377	0.27	0.34
						0.137931	0.37	0.21
						0.0901639	0.36	0.25
						0.245098	0.38	0.13
						0.205882	0.24	0.1
						0.0227273	0.23	0.21
						0.219298	0.41	0.16
						0.416667	0.33	0.03
						-0.269231	0.24	0.8
						0.136364	0.35	0.2
						-0.0686275	0.22	0.29
						0.155172	0.38	0.2
						-0.192308	0.2	0.45
						-0.107143	0.22	0.34
						0.175	0.27	0.13
						0.0172414	0.15	0.14
						-0.0901639	0.25	0.39
PR average	0.235595				PR average	0.0940321
SEM	0.0217967				SEM	0.028274
z score	10.8088				z score	3.32574
Figure 4G
Social investigation
	OMP++	OMP--								Intruder 1 OMP++ vs Intruder 1 OMP-- (genotype comparaison)
	Intruder 1	Intruder 1								F value non significant
	32.8	12.8								t test, unpaired, parametric, two-tailed, p=0.6771, ns
	42.6	33.8
	33.2	31.5
	22.4	50.1
	6.8	49.4
	30	16.2
		24.7
										Intruder 1 OMP++ vs Intruder 1 OMP-- session 2 (genotype comparaison)
Session 2	Intruder 1	Intruder 1								F value significant p=0.0303, *
	9.5	19.4								Mann Whitney (wilcoxon), unpaired, nonparametric, two-tailed, p=0.0012, **
	11.1	15.9
	4	15.7
	7.3	37.6
	1.7	36
	6.7	18.3
		12.1
										Intruder 2 OMP++ vs Intruder 2 OMP-- (genotype comparaison)
	Intruder 2	Intruder 2								F value significant p=0.0333, *
	14.2	7.2								Mann Whitney (wilcoxon), unpaired, nonparametric, two-tailed, p=0.0140, *
	11.8	19
	16.9	33.7
	9.9	25.1
	5.7	37.2
	6.6	23
		45.2
										OMP++ Intruder 1 vs Intruder 1 session 2 (group comparaison)
										t test, paired, parametric, one-tailed, p=0.0015,**
										OMP++ Intruder 1 session 2 vs Intruder 2 (group comparaison)
										t test, paired, parametric, one-tailed, p=0.0413,*
										OMP-- Intruder 1 vs Intruder 1 session 2 (group comparaison)
										t test, paired, parametric, one-tailed, p=0.0221,*
										OMP-- Intruder 1 session 2 vs Intruder 2 (group comparaison)
										t test, paired, parametric, one-tailed, p=0.2205, ns

## Sheet: S2
Figure S2D
						Statistical tests
c-Fos density GC-D
	non-stimulated		stimulated
	OMP++	OMP--	OMP++	OMP--		non-stimulated OMP++ vs stimulated OMP++ (group comparaison)
	0.364873	0.715402	1.76356	1.30268		F value non significant
	1.16649	1.00033	1.43626	1.34961		t test, unpaired, parametric, one-tailed, p=0,0201, *
	0.787795	1.16462	1.97874	1.60579
	1.68084	1.11965	2.20444	2.54895		non-stimulated OMP-- vs stimulated OMP-- (group comparaison)
				2.22179		F value non significant
				1.54099		t test, unpaired, parametric, one-tailed, p=0,0114, *
Figure S2E
c Fos intensity GC-D
	non-stimulated		stimulated
	OMP++	OMP--	OMP++	OMP--		non-stimulated OMP++ vs stimulated OMP++ (group comparaison)
	0.826313	0.590428	2.24662	2.63648		F value non significant
	0.730636	0.64317	2.77966	2.7758		t test, unpaired, parametric, one-tailed, p=0,0047, **
	1.07382	1.3075	1.61879	1.67639
	1.42828	1.4589	1.87244	1.34155		non-stimulated OMP-- vs stimulated OMP-- (group comparaison)
				1.92819		F value non significant
				2.1691		t test, unpaired, parametric, one-tailed, p=0,0057, **
Figure S2F
c-Fos density GC-D	non-stimulated
	OMP++	OMP--				OMP++ vs OMP-- (genotype comparaison)
	0.0666667	0.14537				F value non significant
	0.213131	0.203268				t test, unpaired, parametric, two-tailed, p=0,7228, ns
	0.143939	0.236652
	0.30711	0.227513
Figure S2G
c Fos intensity GC-D
	non-stimulated
	OMP++	OMP--				OMP++ vs OMP-- (genotype comparaison)
	10502	9963.33				F value non significant
	9286	10853.3				t test, unpaired, parametric, two-tailed, p=0,3866, ns
	13647.7	22063.7
	18152.7	24618.7
